# Trichostatin A Modulates Thiazolidinedione-Mediated Suppression of Tumor Necrosis Factor $\alpha$ -Induced Lipolysis in 3T3-L1 Adipocytes

Juu-Chin Lu<sup>1,2\*</sup>, Yu-Tzu Chang<sup>1</sup>, Chih-Tien Wang<sup>4</sup>, Yu-Chun Lin<sup>1,2</sup>, Chun-Ken Lin<sup>2</sup>, Zhong-Sheng Wu<sup>3</sup>

**1** Department of Physiology and Pharmacology, College of Medicine, Chang Gung University, Taoyuan, Taiwan, **2** Graduate Institute of Biomedical Sciences, College of Medicine, Chang Gung University, Taoyuan, Taiwan, **3** Department of Biomedical Sciences, College of Medicine, Chang Gung University, Taoyuan, Taiwan, **4** Institute of Molecular and Cellular Biology, National Taiwan University, Taipei, Taiwan

## Abstract

In obesity, high levels of tumor necrosis factor  $\alpha$  (TNF $\alpha$ ) stimulate lipolysis in adipocytes, leading to hyperlipidemia and insulin resistance. Thiazolidinediones (TZDs), the insulin-sensitizing drugs, antagonize TNF $\alpha$ -induced lipolysis in adipocytes, thereby increasing insulin sensitivity in diabetes patients. The cellular target of TZDs is peroxisome proliferator-activated receptor  $\gamma$  (PPAR $\gamma$ ), a nuclear receptor that controls many adipocyte functions. As a transcription factor, PPAR $\gamma$  is closely modulated by coregulators, which include coactivators and corepressors. Previous studies have revealed that in macrophages, the insulin-sensitizing effect of PPAR $\gamma$  may involve suppression of proinflammatory gene expression by recruiting the corepressor complex that contains corepressors and histone deacetylases (HDACs). Therefore, we investigated whether the corepressor complex is involved in TZD-mediated suppression of TNF $\alpha$ -induced lipolysis in 3T3-L1 adipocytes. Trichostatin A (TSA), a pan HDAC inhibitor (HDACI) that inhibits class I and II HDACs, was used to examine the involvement of HDACs in the actions of TZDs. TSA alone increased basal lipolysis and attenuated TZD-mediated suppression of TNF $\alpha$ -induced lipolysis. Increased basal lipolysis may in part result from class I HDAC inhibition because selective class I HDACI treatment had similar results. However, attenuation of TZD-mediated TNF $\alpha$  antagonism may be specific to TSA and related hydroxamate-based HDACI rather than to HDAC inhibition. Consistently, corepressor depletion did not affect TZD-mediated suppression. Interestingly, TSA treatment greatly reduced PPAR $\gamma$  levels in differentiated adipocytes. Finally, extracellular signal-related kinase 1/2 (ERK1/2) mediated TNF $\alpha$ -induced lipolysis, and TZDs suppressed TNF $\alpha$ -induced ERK phosphorylation. We determined that TSA increased basal ERK phosphorylation, and attenuated TZD-mediated suppression of TNF $\alpha$ -induced ERK phosphorylation, consistent with TSA's effects on lipolysis. These studies suggest that TSA, through down-regulating PPAR $\gamma$ , attenuates TZD-mediated suppression of TNF $\alpha$ -induced ERK phosphorylation and lipolysis in adipocytes.

**Citation:** Lu J-C, Chang Y-T, Wang C-T, Lin Y-C, Lin C-K, et al. (2013) Trichostatin A Modulates Thiazolidinedione-Mediated Suppression of Tumor Necrosis Factor  $\alpha$ -Induced Lipolysis in 3T3-L1 Adipocytes. PLoS ONE 8(8): e71517. doi:10.1371/journal.pone.0071517

**Editor:** Hongyuan Yang, The University of New South Wales, Australia

**Received:** March 27, 2013; **Accepted:** July 1, 2013; **Published:** August 9, 2013

**Copyright:** © 2013 Lu et al. This is an open-access article distributed under the terms of the Creative Commons Attribution License, which permits unrestricted use, distribution, and reproduction in any medium, provided the original author and source are credited.

**Funding:** This study was supported by the National Science Council Grant NSC99-2320-B-N-182-020-MY2, NSC101-2320-B-182-007 (to JCL), NSC100-2321-B-002-001 (to CTW), and Chang Gung Medical Research Project CMRPD180511, CMRPD180512, CMRPD180513 (to JCL). The funders had no role in study design, data collection and analysis, decision to publish, or preparation of the manuscript.

**Competing Interests:** The authors have declared that no competing interests exist.

\* E-mail: juuchin@mail.cgu.edu.tw

## Introduction

Obesity is characterized by increased proinflammatory cytokine secretion from hypertrophied adipocytes and infiltrated macrophages as well as elevated levels of circulating free fatty acids (FFAs), primarily resulting from lipolysis of triglycerides (TG) stored in adipocytes. Elevated proinflammatory cytokine and FFA levels mediate obesity-associated diseases, such as insulin resistance, type 2 diabetes, and cardiovascular diseases [1,2]. Tumor necrosis factor  $\alpha$  (TNF $\alpha$ ) is one of the elevated inflammatory factors in obesity that is elevated and plays an important role in obesity-associated diseases [3,4]. In addition to its role in inflammation, TNF $\alpha$  also increases lipolysis in adipocytes, which may contribute to elevated FFA circulation [3,5,6,7].

The mechanism by which TNF $\alpha$  stimulates lipolysis is not completely understood. Unlike the acute lipolysis that is stimulated by catecholamines during fasting (within minutes), TNF $\alpha$  requires

a longer duration (6–16 hours) to induce measurable lipolysis [8,9], suggesting that transcriptional regulation is involved [10]. The early signaling pathways that is involved in TNF $\alpha$ -induced lipolysis have been studied in both human and rodent adipocytes. In human adipocytes, p44/42 extracellular signal-related kinase 1/2 (ERK1/2) and c-Jun N-terminal kinase (JNK), but not p38 mitogen-activated protein kinase (MAPK), mediate TNF $\alpha$ -induced lipolysis [10,11]. By contrast, ERK but not JNK mediates TNF $\alpha$ -induced lipolysis in 3T3-L1 adipocytes [12]. Moreover, elevated cyclic AMP (cAMP) levels and protein kinase A (PKA) activation mediate in TNF $\alpha$ -induced lipolysis in human adipocytes, [7,13], whereas the involvement of cAMP and PKA in TNF $\alpha$ -induced lipolysis is controversial in mouse adipocytes [12,14]. Finally, TNF $\alpha$ -induced down-regulation of perilipin, which is a surface protein that protects stored TG in adipocyte lipid droplets from hydrolytic lipase activity, has been observed in both human and murine adipocytes [11,12].

The insulin-sensitizing drug thiazolidinediones (TZDs), which include rosiglitazone (Rosi) and pioglitazone, have been shown to block TNF $\alpha$ -stimulated lipolysis [8,12]. TZDs suppress TNF $\alpha$ -induced ERK phosphorylation [12], and reverse TNF $\alpha$ -induced down-regulation of perilipin [8,12,15]. However, the detailed mechanism remains incompletely understood. The cellular target of TZDs is peroxisome proliferator-activated receptor  $\gamma$  (PPAR $\gamma$ ), which is a nuclear receptor that is modulated by transcriptional coregulators including coactivators and corepressors. The corepressor complex, which includes corepressors and histone deacetylases (HDACs), mediates the PPAR $\gamma$  antagonism against inflammatory gene expression in macrophages [16]. However, the role of corepressors and HDACs in adipocytes remains largely unknown. In particular, whether the corepressors and HDACs are involved in TZD-mediated suppression of TNF $\alpha$  actions, such as lipolysis, remains to be determined.

HDACs can be divided into groups based on homology to yeast HDACs [17]. Classical HDACs are zinc-dependent enzymes which include class I (HDAC1, -2, -3, and -8) and class II HDACs (HDAC4, -5, -6, -7, -9, -10). Class I HDACs generally localize to the nucleus, whereas class II HDACs can shuttle between the nucleus and the cytoplasm. HDACs have been recognized to play an important role in regulating proliferation, differentiation, and development [18]. HDAC inhibitors (HDACIs) have been developed as therapeutic drugs for treating cancer and certain neurodegenerative disorders [17]. The hydroxamate-based HDACI vorinostat (also known as suberoylanilide hydroxamic acid, SAHA) is currently approved for cutaneous T-cell lymphoma treatment [19], whereas the aliphatic acid-based HDACI valproic acid (VPA) has long been used for epilepsy or bipolar disorder treatment [20]. While HDACIs demonstrate great promise for disease treatment, the mechanisms by which these effects are mediated remain elusive, and side effects of HDACI treatment have been reported including metabolic effects [21,22]. For example, VPA treatment has been associated weight gain and insulin resistance in patients [21,23]. The pan HDACIs such as SAHA and its related compound trichostatin A (TSA) inhibit both class I and class II HDACs, whereas VPA has high potency for class I HDACs. Moreover, selective HDACIs, such as MS275 (class I) and MC1568 (class II), have also been developed. In preadipocytes, HDACI treatment either suppresses [24,25,26] or promotes [27,28] adipocyte differentiation. However, the effects of HDACIs on differentiated adipocyte physiology such as lipolysis have not been examined.

In the current study, we used TSA, a natural hydroxamic acid and a pan HDACI, to assess the involvement of the HDACs in TZD-mediated suppression of TNF $\alpha$ -induced lipolysis in 3T3-L1 adipocytes. We observed that TSA treatment not only increased basal lipolysis, but also attenuated TZD-mediated suppression of TNF $\alpha$ -induced lipolysis in adipocytes. Increased basal lipolysis by TSA may be in part due to inhibition of class I HDACs, whereas attenuation of TZD-mediated suppression of TNF $\alpha$  action may be specific to TSA and its related hydroxamate-based HDACI SAHA. Moreover, TSA treatment greatly down-regulated PPAR $\gamma$  isoforms in differentiated adipocytes, thereby affecting TZD-mediated suppression of TNF $\alpha$ -induced ERK phosphorylation and lipolysis. Given that SAHA is currently approved for clinical use, the detailed mechanisms underlying HDACI-mediated cellular modulation merit further investigation.

## Materials and Methods

### Chemicals and Reagents

TSA (T8852), SAHA (SML0061), MC1568 (M1824), and U0126 (U120) were purchased from Sigma Chemical (St. Louis, MO). MS275 (E-3866) was purchased from LC Laboratories (Woburn, MA). Recombinant murine TNF $\alpha$  (No. 410-MT) was from R & D Systems (Minneapolis, MN). Rosiglitazone (No.71740) was from Cayman Chemical (Ann Arbor, MI). Polyclonal antibodies against phospho-ERK1/2 (Thr202/Tyr204, #4377), total ERK1/2 (#9102), and rabbit monoclonal antibodies against PPAR $\gamma$  (clone 81B8, #2443) were from Cell Signaling Technology (Beverly, MA). Anti-acetyl-Histone H3 (#06-599) and anti-NCoR (#ABE251) antibodies were from Millipore Corporation (Temecula, CA). Anti-SMRT antibodies (#PA1-842) were from Thermo Scientific (Rockford, IL). Anti- $\alpha$ -tubulin (#T5168) and anti-acetylated tubulin (#T6793) antibodies were from Sigma Chemical (St Louis, MO).

### Cell Culture and Differentiation

3T3-L1 fibroblasts (CL-173) were obtained from American Type Culture Collection (Manassas, VA), and were cultured and differentiated as described previously [29]. In brief, cells were cultured in growth media (Dulbecco's modified Eagle medium with 4.5 g/L glucose, 10% fetal bovine serum, 1% glutamine, and 0.5% penicillin/streptomycin). Differentiation was induced in post-confluent cells with growth media containing 500  $\mu$ M isobutylmethylxanthine, 0.2  $\mu$ M dexamethasone, and 2.5  $\mu$ g/ml insulin for 3-4 days, and cells were replenished with growth media every 3-4 days. Experiments were performed in adipocytes 12-16 days post differentiation.

### Electroporation and siRNA

Differentiated 3T3-L1 adipocytes were electroporated at 200 V and 950  $\mu$ F with 2 nmole siRNA using a Gene Pulser Xcell electroporator (Bio-Rad, Hercules, CA) and were plated onto appropriate plates or dishes for experiments. Experiments were performed 48 h after electroporation. siRNA duplexes were designed using either the published sequences or a commercial design program (Thermo Scientific). The siRNA sequences were as follows: PPAR $\gamma$ , 5'-CAA CAG GCC TCA TGA AGA A-3' [30], 5'-ATT AAG GAA TTC ATG TCG TAG-3' [31]; NCoR, 5'-GCT GCA TCC AAG GGC CAT G-3' [32], 5'-GGG CAA AGC TAT TTA GGA A-3'; SMRT, 5'-AAG CTG AAG AAG AAG CAG CAA-3' [33], 5'-AGA CCA TCA TCA ATG ACT A-3'. Luciferase siRNA duplex 5'-TCG AAG TAT TCC GCG TAC G-3' were used as a control. The absence of homology to any other gene was confirmed using a BLAST search (National Center for Biotechnology Information, National Institutes of Health).

### RNA Analysis

Total cellular RNA was isolated and purified using TRIzol reagent (Ambion, Austin, TX) according to the manufacturer's instructions. First strand cDNA was synthesized from 1  $\mu$ g total RNA using high-capacity cDNA RT kits (Applied Biosystems). SYBR green PCR was performed using the MiniOpticon real-time PCR detection system (Bio-Rad, Hercules, CA). The following primers were used for PCR: PPAR $\gamma$  forward 5'-GCC CTT TGG TGA CTT TAT GG-3', reverse 5'-CAG CAG GTT GTC TTG GAT GT-3'; SMRT forward 5'-GGG AGT GAA CGG TCT CAG GAG C-3', reverse 5'-GTA GTA GCT CCA GGC GGG GG-3'; NCoR forward 5'-TTA CCA CAG GCA GAC ACC AG-3', reverse 5'-CCG TAT GGT CAG AGG GTT GT-3'. 36B4

forward 5'-GCG ACC TGG AAG TCC AAC TAC-3', reverse 5'-ATC TGC TGC ATC TGC TTG G-3'. Gene expression levels were calculated after normalization to the housekeeping gene 36B4 using the  $\Delta\Delta CT$  method as described by the manufacturer and expressed as relative mRNA levels compared with the control.

### Measurement of Lipolysis

Lipolysis was measured using free glycerol reagent (Sigma, St Louis, MO) according to manufacturer's specifications. In brief, 3T3-L1 adipocytes were washed twice with PBS and were then incubated in 0.5 ml phenol red-free DMEM containing 3% BSA and the desired treatments for 24 h. Cell media were collected and centrifuged at full speed for 1 min to remove cell debris, and the supernatants were divided into aliquots for the assays. Ten microliters of sample was incubated with 180  $\mu$ l free glycerol assay reagent for 15 min at room temperature, and the absorbance was read at 540 nm. A standard curve constructed from the glycerol standards was used to calculate glycerol concentration in the culture supernatants. The cells remaining on the plate were washed and lysed in 1 N NaOH, and protein concentrations were measured and used to normalize glycerol release.

### Western Blot Analysis

Western blot analysis was performed as described previously [34]. In brief, cells were extracted with RIPA lysis buffer (50 mM HEPES, pH 7.4, 1% NP-40, 150 mM NaCl, 1 mM EDTA, 1 mM phenylmethylsulfonyl fluoride, 1  $\mu$ g/ml leupeptin, 1 mM sodium orthovanadate, 1 mM sodium fluoride). Twenty microliters of cellular protein lysate was electrophoresed through standard Laemmli SDS polyacrylamide gels (7-12% gels), transferred to polyvinylidene fluoride membranes, and then probed with appropriate antibodies. Membranes were blocked for 1 h in 5% BSA in TBST (100 mM Tris-HCl, pH 7.5, 150 mM NaCl, and 0.1% Tween 20) and then incubated in primary antibodies at 4°C overnight. Membranes were washed three times with TBST and then incubated with secondary antibodies in 5% milk in TBST at room temperature for 1 h. Membranes were washed three times with TBST, and then signals were visualized by enhanced chemiluminescence followed by autoradiography.

### Statistics

All of the data were presented as the mean  $\pm$  S.E. Differences between the means of two groups were evaluated for statistical significance with paired or unpaired Student's two-tailed *t*-tests. A *p* value cut-off of 0.05 was considered statistically significant (InStat 3, GraphPad).

## Results

### TSA Treatment Reduces Rosi-mediated Suppression of TNF $\alpha$ -induced Lipolysis in 3T3-L1 Adipocytes

Chronic TNF $\alpha$  treatment increases lipolysis in 3T3-L1 adipocytes, whereas Rosi suppresses the TNF $\alpha$ -induced lipolysis [8,12]. In macrophages, a complex of transcription corepressor and HDACs has been shown to mediate Rosi suppression of inflammatory gene expression [35,36]. Since TNF $\alpha$  is a proinflammatory cytokine which induces many proinflammatory actions such as inflammatory gene expression and proinflammatory signaling pathways, we tested if anti-inflammatory mechanism may be involved in Rosi-mediated suppression of TNF $\alpha$ -induced lipolysis in adipocytes. To determine whether HDACs may be involved in Rosi-mediated suppression of TNF $\alpha$ -induced lipolysis, differentiated 3T3-L1 adipocytes were treated with or without

200 ng/ml (equal to 660 nM) TSA, a pan HDAC inhibitor, for 24 h, and its effects on Rosi-mediated suppression of TNF $\alpha$ -induced lipolysis were determined by measuring glycerol content in the media after treatment. As shown in Fig. 1, TNF $\alpha$  treatment induced a 3-fold increase of lipolysis in adipocytes (bar 3 vs 1), whereas co-treatment with 1  $\mu$ M Rosi suppressed TNF $\alpha$ -induced lipolysis (bar 4 vs 3), which is consistent with previous reports [12]. Interestingly, TSA treatment alone elevated basal lipolysis (bar 5 vs 1). Moreover, TSA treatment also attenuated Rosi-mediated suppression of TNF $\alpha$ -induced lipolysis (bar 8 vs 7).

To determine the effective TSA dose that attenuated Rosi-mediated suppression of TNF $\alpha$ -induced lipolysis, a dose response experiment was performed. 3T3-L1 adipocytes were treated with different TSA doses (0, 6.6, 66, 660, 6600 nM), and TNF $\alpha$ -induced lipolysis was measured in the presence or absence of Rosi. As shown in Fig. 2, TSA-mediated effects on basal lipolysis and attenuation of TZD action were dose-dependent: TSA was effective at 660 nM or greater, but the effect was gradually lost when the concentrations dropped to 66 nM or lower.

### PPAR $\gamma$ , but not its Corepressor NCoR or SMRT, is Required for Rosi-mediated Suppression of TNF $\alpha$ -induced Lipolysis

One potential mechanism by which HDACs modulate transcription factor action is through transcriptional corepressors, which recruit HDACs to the gene promoters for transcriptional suppression. To examine if corepressors may be involved in Rosi-mediated suppression of TNF $\alpha$ -induced lipolysis, the expression of PPAR $\gamma$  corepressors such as nuclear receptor corepressor (NCoR)

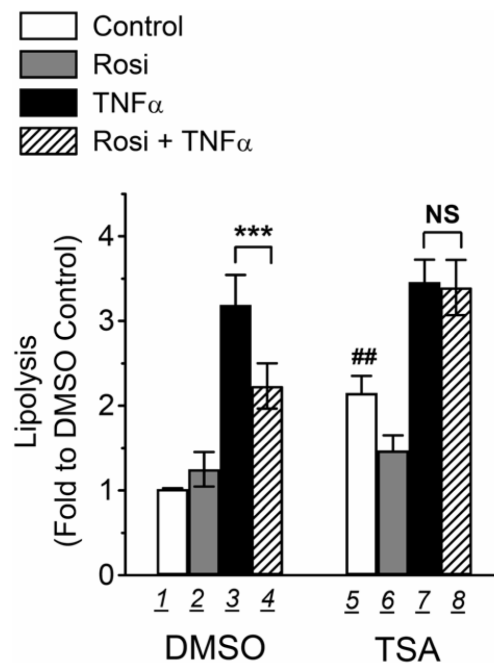

**Figure 1. TSA treatment attenuates Rosi suppression of TNF $\alpha$ -induced lipolysis in 3T3-L1 adipocytes.** 3T3-L1 adipocytes were treated with vehicle (Control), 1  $\mu$ M Rosi (Rosi), 10 ng/ml TNF $\alpha$  (TNF $\alpha$ ), or both (Rosi+TNF $\alpha$ ), together with vehicle (DMSO, bars 1-4) or 660 nM TSA (TSA, bars 5-8) for 24 h. Glycerol released into the media and protein concentrations of cell lysate were determined as described in *Materials and Methods*. Each point represents the mean  $\pm$  S.E. of seven independent experiments. Asterisks denote significant differences (\*\*\*) *p*<0.001. NS, not significant. ##*p*<0.01 bar 5 vs 1. doi:10.1371/journal.pone.0071517.g001

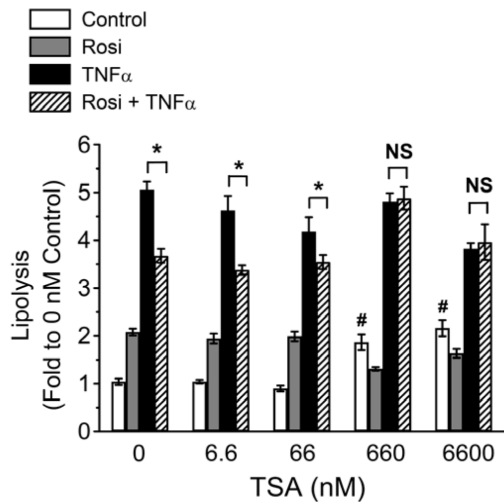

**Figure 2. TSA attenuates Rosi-mediated suppression of TNF $\alpha$ -induced lipolysis in a dose-dependent manner.** 3T3-L1 adipocytes were treated with vehicle (Control), 1  $\mu$ M Rosi (Rosi), 10 ng/ml TNF $\alpha$  (TNF $\alpha$ ), or both (Rosi+TNF $\alpha$ ), together with increasing TSA doses (0, 6.6, 66, 660, 6600 nM) for 24 h. Glycerol released into the media and protein concentrations of cell lysate were determined as described in *Materials and Methods*. Each point represents the mean  $\pm$  S.E. of three independent experiments. Asterisks denote significant differences ( $p < 0.05$ ). NS, not significant. # $p < 0.05$  vs 0 nM control. doi:10.1371/journal.pone.0071517.g002

or silencing mediator of retinoic acid and thyroid hormone receptor (SMRT) was depleted in differentiated 3T3-L1 adipocytes by RNAi-mediated gene silencing. The RNAi knockdown efficiency was determined by both real-time qPCR (Fig. 3A) and Western blot analysis (Fig. S1).

The effect of corepressor depletion on Rosi-mediated suppression of TNF $\alpha$ -induced lipolysis was determined. As shown in Fig. 3B, TNF $\alpha$  induced lipolysis in control adipocytes (Luc), and Rosi co-treatment suppressed this induction, a result similar to what were observed in non-transfected cells in Fig. 1. SMRT or NCoR depletion did not affect Rosi-mediated suppression of TNF $\alpha$ -induced lipolysis (hatched vs black bar, Fig. 3B), suggesting that corepressor SMRT or NCoR may not be involved in Rosi-mediated suppression of TNF $\alpha$ -induced lipolysis. By contrast, PPAR $\gamma$  depletion elevated basal lipolysis, although these data were not significantly different compared to Luc control. Moreover, PPAR $\gamma$  depletion attenuated Rosi-mediated suppression of TNF $\alpha$ -induced lipolysis, confirming the requirement of PPAR $\gamma$  for Rosi-mediated suppression.

### Hydroxamic Acid-based HDACi SAHA, but not Other HDACi, Attenuates Rosi-mediated Suppression of TNF $\alpha$ -induced Lipolysis in 3T3-L1 Adipocytes

TSA is a broad-spectrum HDACi that inhibits class I and II HDAC activities. To determine which class of HDACs may be involved in TSA-mediated attenuation of Rosi-mediated suppression of TNF $\alpha$ -induced lipolysis, we treated the cells with selective HDACi and examined their effects on Rosi-mediated suppression of TNF $\alpha$ -induced lipolysis. To confirm the selectivity of these HDAC inhibitors, we first examined the hyperacetylation of histone H3 and tubulin, which are substrates of class I and class II HDACs, respectively. As shown in Fig. 4A, the broad-spectrum HDACi TSA and its related hydroxamate-based HDACi SAHA increased acetylation of both histone H3 and tubulin, consistent with their inhibition of class I and class II HDACs. Selective class I

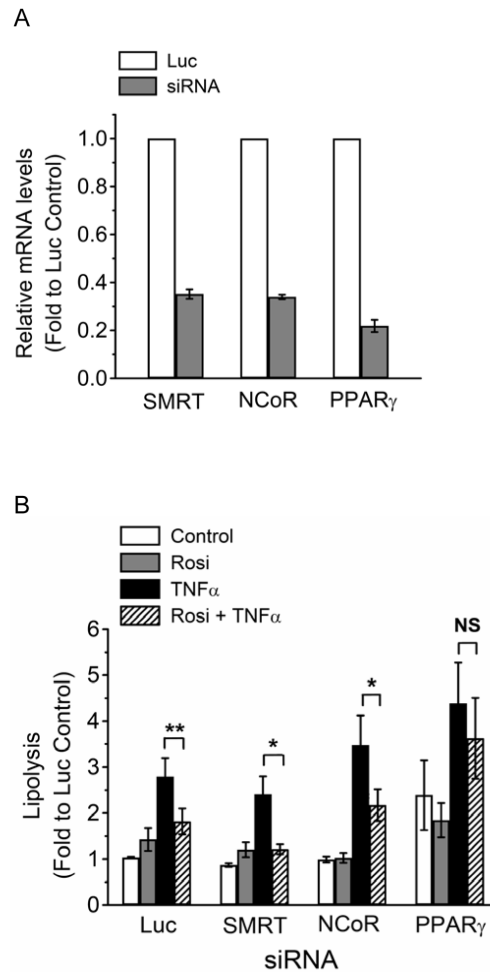

**Figure 3. PPAR $\gamma$ , but not corepressor SMRT or NCoR, is required for Rosi-mediated suppression of TNF $\alpha$ -induced lipolysis.** (A) 3T3-L1 adipocytes were transfected with non-targeting luciferase siRNA (Luc), or siRNA against SMRT, NCoR, or PPAR $\gamma$ . The levels of mRNA were determined by qPCR. Each point represents the mean  $\pm$  S.E. of at least three independent experiments. (B) 3T3-L1 adipocytes were transfected with control (Luc), SMRT, NCoR, or PPAR $\gamma$  siRNA. 24 h post transfection, cells were treated with vehicle (Control), 1  $\mu$ M Rosi (Rosi), 10 ng/ml TNF $\alpha$  (TNF $\alpha$ ), or both (Rosi+TNF $\alpha$ ) for additional 24 h. Glycerol released into the media and protein concentrations of cell lysate were determined as described in *Materials and Methods*. Each point represents the mean  $\pm$  S.E. of four independent experiments. Asterisks denote significant differences (\* $p < 0.05$ ; \*\* $p < 0.01$ ). NS, not significant. doi:10.1371/journal.pone.0071517.g003

HDACi MS275 treatment increased only acetylated histone H3 but not tubulin. By contrast, class II HDACi MC1568 treatment selectively enhanced acetylated tubulin without increasing histone H3 acetylation.

We then examined the effects of selective HDACi on Rosi-mediated suppression of TNF $\alpha$ -induced lipolysis. As shown in Fig. 4B, TSA treatment increased basal lipolysis and attenuated the Rosi-mediated suppression of TNF $\alpha$ -induced lipolysis, similar to the results shown in Figs. 1 and 2. Similar to TSA, treatment with class I HDACi MS275 also increased basal lipolysis (white bar, MS275 vs DMSO). However, MS275 treatment did not affect Rosi-mediated suppression of TNF $\alpha$ -induced lipolysis (hatched vs black bar). By contrast, class II HDACi MC1568 treatment did not affect basal lipolysis or Rosi-mediated suppression of TNF $\alpha$ -

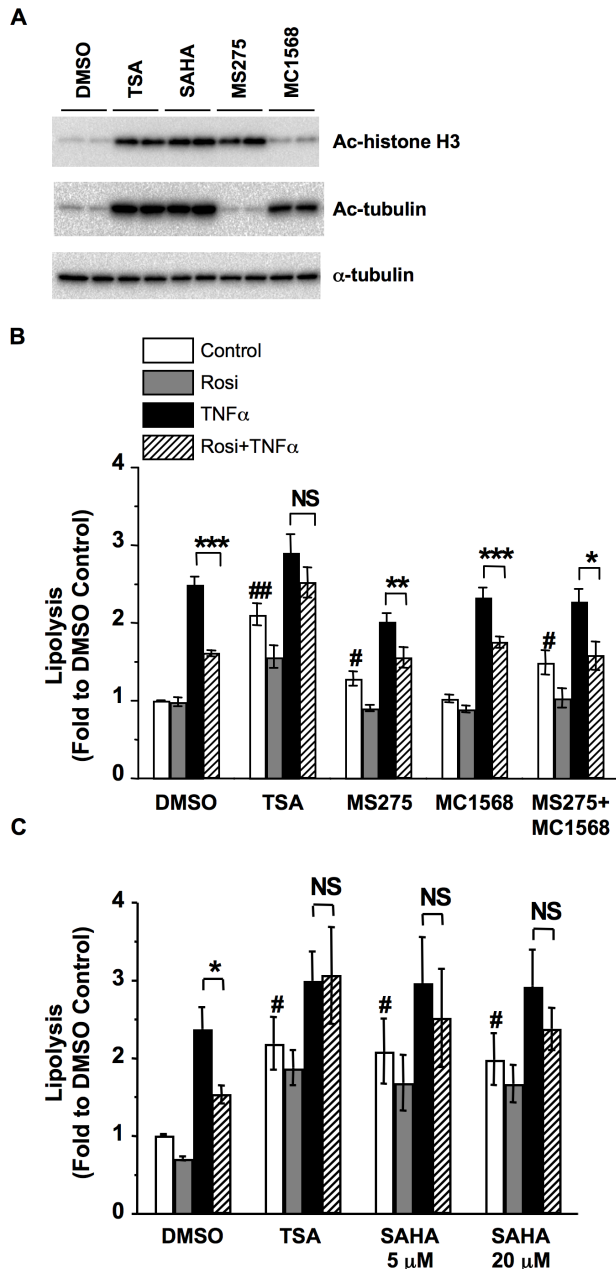

**Figure 4. TSA and SAHA, but not other HDACI, attenuates Rosi suppression of TNF $\alpha$ -induced lipolysis.** (A) 3T3-L1 adipocytes were treated with DMSO, 660 nM TSA, 20  $\mu$ M SAHA, 10  $\mu$ M MS275, or 5  $\mu$ M MC1568 for 24 h. Cellular proteins were solubilized and subjected to SDS-PAGE and Western blot analysis with the indicated antibodies. Samples were treated in duplicate. Representative immunoblots from three independent experiments are shown. (B) 3T3-L1 adipocytes were treated with vehicle (Control), 1  $\mu$ M Rosi (Rosi), 10 ng/ml TNF $\alpha$  (TNF $\alpha$ ), or both (Rosi+TNF $\alpha$ ), together with vehicle (DMSO), 660 nM TSA, 10  $\mu$ M MS275, 5  $\mu$ M MC1568, or combination of MS275 and MC1568 (MS275+MC1568) for 24 h. (C) 3T3-L1 adipocytes were treated with vehicle (Control), 1  $\mu$ M Rosi (Rosi), 10 ng/ml TNF $\alpha$  (TNF $\alpha$ ), or both (Rosi+TNF $\alpha$ ), together with vehicle (DMSO), 660 nM TSA (TSA), 5 or 20  $\mu$ M SAHA (SAHA) for 24 h. Glycerol released into the media and protein concentrations of cell lysate were determined as described in *Materials and Methods*. Each point represents the mean  $\pm$  S.E. of four independent experiments. Asterisks denote significant differences (\* $p$ <0.05; \*\* $p$ <0.01; \*\*\* $p$ <0.001). NS: not significant. # $p$ <0.05, ## $p$ <0.01 vs the corresponding DMSO Control. doi:10.1371/journal.pone.0071517.g004

induced lipolysis. These results suggested that the effect of TSA to elevate basal lipolysis is in part due to class I HDAC inhibition. However, TSA-mediated attenuation of Rosi-mediated suppression of TNF $\alpha$ -induced lipolysis may not result from HDAC inhibition. Simultaneously treatment with both MC1568 and MS275 did not affect the Rosi-mediated suppression of TNF $\alpha$ -induced lipolysis (Fig. 4B), ruling out the need to inhibit both class I and class II HDACs for TSA's modulation on Rosi-mediated suppression.

TSA belongs to the hydroxamate-based HDACIs which also include SAHA, an HDACI currently approved by the FDA for the treatment of cutaneous T-cell lymphoma [19]. To access whether the TSA effects could be reproduced by another hydroxamate-based HDACI, 3T3-L1 adipocytes were treated with vehicle (DMSO), TSA, or SAHA, and TNF $\alpha$ -induced lipolysis was determined in the presence or absence of Rosi. As shown in Fig. 4C, treatment with 5 or 20  $\mu$ M SAHA also elevated basal lipolysis and attenuated Rosi-mediated suppression of TNF $\alpha$ -induced lipolysis. Together, these results suggest that the effects of TSA treatment on Rosi-mediated suppression of TNF $\alpha$ -induced lipolysis may be specific to hydroxamate-based HDACIs rather than general HDAC inhibition.

#### TSA Down-regulates PPAR $\gamma$ Levels in 3T3-L1 Adipocytes

The absence of effects on Rosi-mediated suppression of TNF $\alpha$ -induced lipolysis by corepressor depletion (Fig. 3) and class-specific HDACI treatment (Fig. 4) suggested that other mechanisms may account for TSA attenuation of the Rosi-mediated suppression of TNF $\alpha$ -induced lipolysis. Previous studies have reported that daily HDACI treatment during preadipocyte adipogenesis reduced PPAR $\gamma$  levels, thereby inhibiting adipocyte differentiation [24]. By contrast, in differentiated adipocytes, treatment with 1 mM VPA did not affect PPAR $\gamma$  expression [37,38]. However, the effects of other HDACIs on PPAR $\gamma$  in differentiated adipocytes have not been examined. Therefore, differentiated 3T3-L1 adipocytes were treated with vehicle (DMSO), TSA, SAHA, MS275, or MC1568, and the expression of PPAR $\gamma$ 1 and  $\gamma$ 2 was determined by Western blot analysis. As shown in Fig. 5, PPAR $\gamma$ 1 and PPAR $\gamma$ 2 levels were greatly reduced in adipocytes that had been treated with broad-spectrum HDACIs TSA or SAHA. Class I HDACI MS275 also reduced the levels of PPAR $\gamma$ 2 but not PPAR $\gamma$ 1. By contrast, class II HDACI MC1568 treatment slightly increased PPAR $\gamma$ 2 or total PPAR $\gamma$  levels without affecting PPAR $\gamma$ 1 levels. These results suggested that through inhibition of class I HDACs, TSA treatment greatly reduced PPAR $\gamma$ 2 expression in differentiated adipocytes. However, TSA and SAHA, but not class I HDACI MS275 treatment, also reduced PPAR $\gamma$ 1 levels. Because TSA and SAHA, but not MS275, attenuated the Rosi-mediated suppression of TNF $\alpha$ -induced lipolysis (Fig. 4B,C), these results suggested that a mechanism by which TSA and SAHA attenuated Rosi-mediated suppression of TNF $\alpha$ -induced lipolysis may result from down-regulation of both PPAR $\gamma$ 1 and 2 in differentiated adipocytes.

#### Down-regulation of PPAR $\gamma$ by TSA Treatment is Dose- and time- Dependent, and may Involve Proteasomal Degradation

In Fig. 2, the TSA effects on basal lipolysis and attenuation of Rosi action were dose-dependent. We also found that TSA treatment down-regulated PPAR $\gamma$  levels (Fig. 5). To determine if TSA down-regulation of PPAR $\gamma$  is also dose-dependent, we performed a dose response experiment. Differentiated 3T3-L1 adipocytes were treated with different TSA doses (0, 6.6, 66, 660, 6600 nM) and their effects on PPAR $\gamma$  levels were determined. As

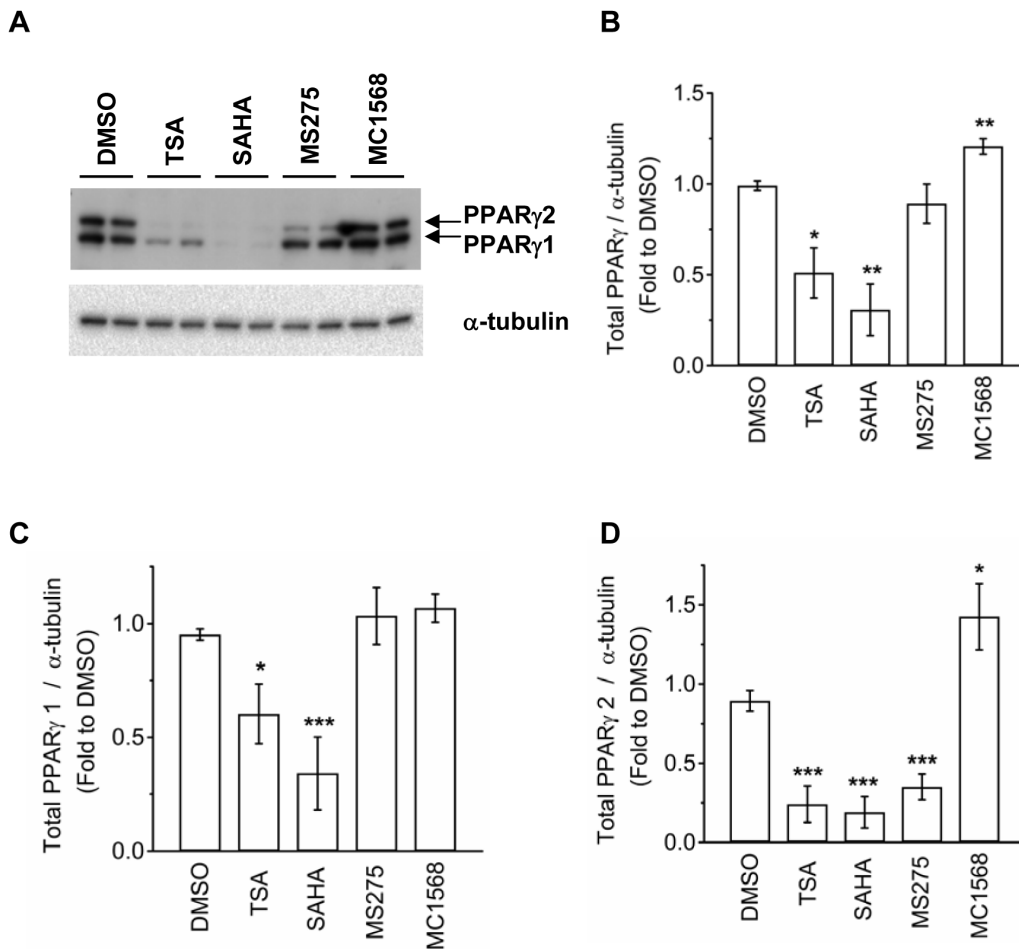

**Figure 5. Effects of HDACI treatment on the levels of PPAR $\gamma$  expression.** (A) 3T3-L1 adipocytes were treated with DMSO, 660 nM TSA, 20  $\mu$ M SAHA, 10  $\mu$ M MS275, or 5  $\mu$ M MC1568 for 24 h. Cellular proteins were solubilized and subjected to SDS-PAGE and Western blot analysis with the indicated antibodies. Samples were treated in duplicate. Representative immunoblots from three independent experiments were shown in 5A. (B-D) Quantification data for total PPAR $\gamma$  (B), PPAR $\gamma$ 1(C), and PPAR $\gamma$ 2 (D) are shown. Asterisks denote significant differences compared with DMSO control (\* $p$ <0.05; \*\* $p$ <0.01; \*\*\* $p$ <0.001). doi:10.1371/journal.pone.0071517.g005

expected, the HDACI activity of TSA, determined by hyperacetylation of histone H3 and tubulin, was increased in a dose-dependent manner (Fig. 6A). However, the concentration required for TSA to down-regulate PPAR $\gamma$  isoforms was 660 nM or greater (Fig. 6AB and Fig. S2AB), which correlated well with the concentrations that were effective in modulation of basal and Rosi-mediated suppression of TNF $\alpha$ -induced lipolysis (Fig. 2). Thus, the concentrations required for TSA down-regulation of PPAR $\gamma$  in differentiated adipocytes were in contrast with previous reports in preadipocytes, in which 3 nM TSA could down-regulate PPAR $\gamma$  [24], suggesting different sensitivities in preadipocytes and differentiated adipocytes.

The time response experiment of TSA treatment was also performed. As shown in Figures 6CD and S2CD, TSA down-regulated PPAR $\gamma$  isoforms at time points as early as 6 hr. The short incubation time required for TSA down-regulation of PPAR $\gamma$  prompted us to test if proteasomal degradation may be involved. We applied proteasomal inhibitor MG132 in combination with TSA treatment. While TSA treatment down-regulated the levels of PPAR $\gamma$  isoforms, the presence of MG132 recovered them (Fig. S3), suggesting that proteasomal degradation may be involved in TSA down-regulation of PPAR $\gamma$  isoforms.

### TSA Treatment Attenuates Rosi-mediated Suppression of TNF $\alpha$ -induced ERK Phosphorylation in 3T3-L1 Adipocytes

To elucidate the possible mechanisms underlying TSA attenuation on Rosi-mediated suppression of TNF $\alpha$ -induced lipolysis, downstream signaling pathways of TNF $\alpha$  were examined. Previous studies have identified that p44/42 MAPK (ERK1/2) mediates TNF $\alpha$ -induced lipolysis in adipocytes [7,12]. Moreover, Rosi treatment suppressed TNF $\alpha$ -induced ERK phosphorylation and lipolysis [12]. Therefore, we tested whether TSA may affect ERK phosphorylation and Rosi-mediated suppression of TNF $\alpha$ -induced ERK phosphorylation.

As shown in Fig. 7A and 7B, TNF $\alpha$  induced ERK phosphorylation, whereas co-treatment with Rosi suppressed TNF $\alpha$ -induced ERK phosphorylation in 3T3-L1 adipocytes, consistent with results from previous reports [12]. Interestingly, TSA treatment alone increased basal ERK phosphorylation, which is consistent with elevated basal lipolysis (Fig. 1). Moreover, the Rosi-mediated suppression of TNF $\alpha$ -induced ERK phosphorylation was attenuated in the presence of TSA (Fig. 7B, TSA, hatched vs black bar). Treatment with MC1568 or MS275 did not affect Rosi-mediated suppression of TNF $\alpha$ -induced ERK phosphorylation, although basal ERK phosphorylation was elevated after

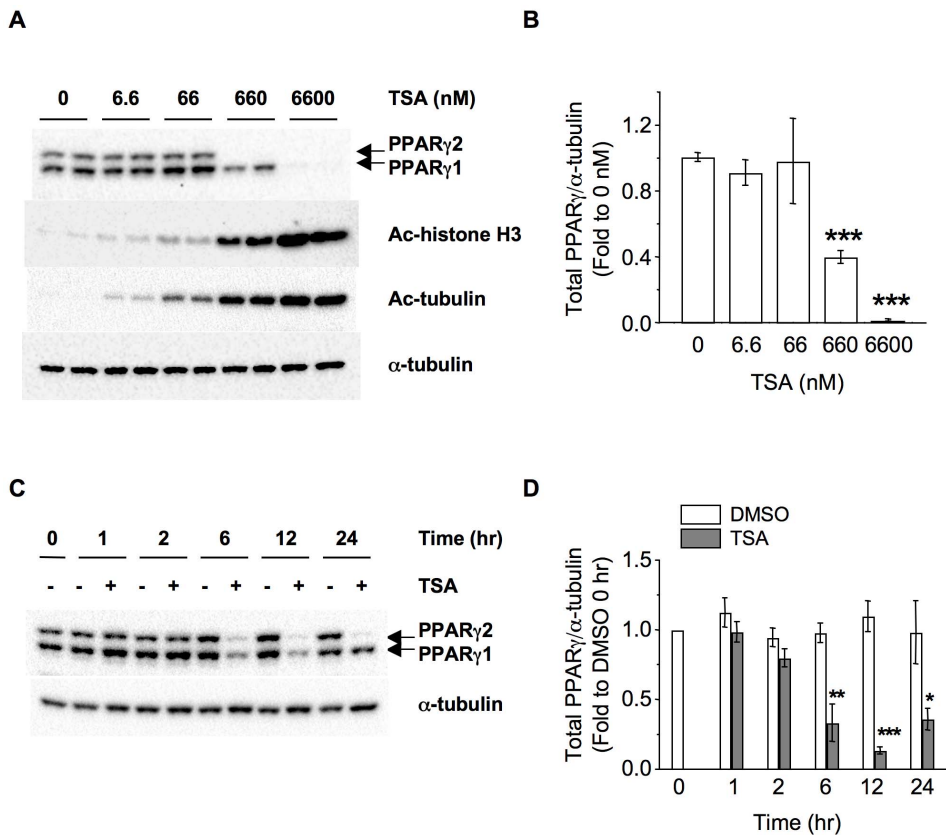

**Figure 6. Down-regulation of PPAR $\gamma$  by TSA treatment is dose- and time- dependent.** (A, B) 3T3-L1 adipocytes were treated in duplicate with increasing TSA doses (0, 6.6, 66, 660, 6600 nM) for 24 h. Cellular proteins were solubilized and subjected to SDS-PAGE and Western blot analysis with the indicated antibodies. Representative immunoblots from three independent experiments were shown in 6A. Quantification data for total PPAR $\gamma$  are shown in 6B. Asterisks denote significant differences compared with 0 nM control (\*\*\* $p$ <0.001). (C, D) 3T3-L1 adipocytes were treated with vehicle (DMSO) or 660 nM TSA (TSA) for 0, 1, 2, 6, 12, or 24 h. Cellular proteins were solubilized and subjected to SDS-PAGE and Western blot analysis with the indicated antibodies. Representative immunoblots from four independent experiments were shown in 6C. Quantification data for total PPAR $\gamma$  are shown in 6D. Asterisks denote significant difference compared with corresponding DMSO value at the same time point (\* $p$ <0.05; \*\* $p$ <0.01; \*\*\* $p$ <0.001). doi:10.1371/journal.pone.0071517.g006

MS275 treatment (Fig. S4). These results correlated with the effects of these HDACs on lipolysis (Fig. 4B). Furthermore, ERK phosphorylation was highly correlated with lipolysis in 3T3-L1 adipocytes measured after the treatments with Rosi, TNF $\alpha$ , or both, in the presence or absence of TSA (Fig. 7C). These results suggest that suppression of ERK phosphorylation may be a mechanism by which Rosi suppresses TNF $\alpha$  action, and TSA may affect Rosi-mediated suppression of TNF $\alpha$  action through modulation of ERK phosphorylation.

#### ERK1/2 may Participate in Rosi-mediated Suppression of TNF $\alpha$ -induced Lipolysis and TSA-mediated Attenuation of Rosi Action

To determine whether ERK1/2 may participate in TSA attenuation of Rosi-mediated suppression of TNF $\alpha$ -induced lipolysis, we used the inhibitor U0126 of mitogen-activated protein kinase kinase (MEK), the upstream kinase to ERK1/2, in our lipolysis assay. The effectiveness of U0126 as MEK inhibitor was confirmed by Western analysis demonstrating that U0126 treatment abolished TNF $\alpha$ -induced ERK phosphorylation (Fig. 8A). Inhibition of ERK1/2 phosphorylation by U0126 reduced TNF $\alpha$ -induced lipolysis (Fig. 8B, bar 11 vs 3) to a level as Rosi and TNF $\alpha$  co-treatment (Fig. 8B, bar 11 vs 4), suggesting that Rosi suppressed TNF $\alpha$ -induced lipolysis by inhibiting TNF $\alpha$ -

induced ERK phosphorylation. Therefore, when ERK phosphorylation was suppressed, Rosi did not reduce TNF $\alpha$ -induced lipolysis further (Fig. 8B, bar 11 vs 12). These results confirmed the role of ERK in the Rosi-mediated suppression of TNF $\alpha$ -induced lipolysis. In the presence of U0126, TSA treatment alone still increased basal lipolysis (Fig. 8B, bar 13 vs 9), and TSA also attenuated Rosi-mediated suppression of TNF $\alpha$ -induced lipolysis (bar 15 vs 16). Because TSA down-regulated PPAR $\gamma$  expression (Fig. 5) and attenuated Rosi-mediated suppression of TNF $\alpha$ -induced ERK phosphorylation (Fig. 7), these results suggested that through modulation of PPAR $\gamma$  level or function, and/or suppression of ERK phosphorylation, TSA attenuated Rosi-mediated suppression of TNF $\alpha$ -induced lipolysis in adipocytes.

#### Discussion

Transcription corepressors and HDACs have been shown to mediate the anti-inflammatory actions of TZDs in macrophages [35,36]. TNF $\alpha$ , a proinflammatory cytokine, chronically stimulates lipolysis in adipocytes, whereas Rosi suppresses TNF $\alpha$ -induced lipolysis. Therefore, we used TSA, a pan HDACI, to test the hypothesis whether HDACs may be involved in Rosi-mediated suppression of TNF $\alpha$ -induced lipolysis in adipocytes. Our results are summarized in Table 1. We have shown that TSA has two

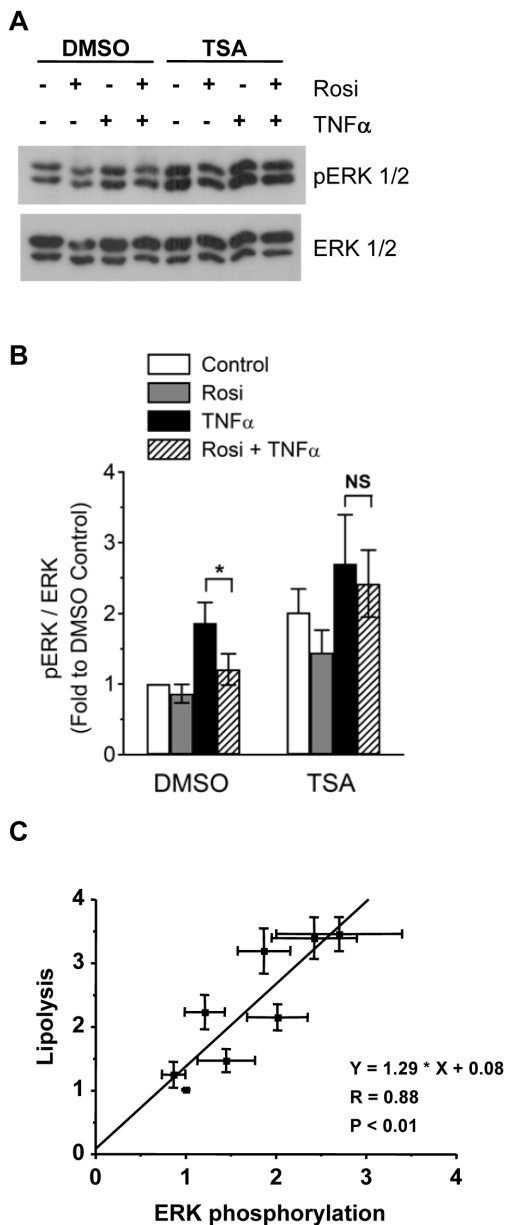

**Figure 7. TSA attenuates Rosi-mediated suppression of TNF $\alpha$ -induced ERK1/2 phosphorylation in 3T3-L1 adipocytes.** (A and B) 3T3-L1 adipocytes were pretreated with vehicle (DMSO) or 660 nM TSA, together with or without 1  $\mu$ M Rosi (Rosi) for 24h. Cells were then treated with or without 10 ng/ml TNF $\alpha$  for 30 min. Cellular proteins were solubilized and subjected to SDS-PAGE and Western analysis with the indicated antibodies. Representative immunoblots and quantification data from five independent experiments are shown in 5A and B, respectively. (C) ERK phosphorylation correlates highly with lipolysis in the treatments of Rosi, TNF $\alpha$ , or both in the presence or absence of TSA, as shown by fitting with linear regression. Individual values were obtained from the experiments described in Figures. 1 and 7B. doi:10.1371/journal.pone.0071517.g007

effects on adipocyte lipolysis. First, TSA treatment increased basal lipolysis. Second, TSA treatment attenuated the Rosi-mediated suppression of TNF $\alpha$ -induced lipolysis. However, the mechanism by which TSA attenuated the Rosi-mediated suppression of TNF $\alpha$  action may not involve HDAC inhibition. TSA and its related hydroxamate-based HDACi SAHA down-regulated the levels of

PPAR $\gamma$ 1 and  $\gamma$ 2 (Fig. 5), the cellular targets of Rosi, which may account for their attenuation of Rosi-mediated suppression of TNF $\alpha$ -induced lipolysis. Moreover, TNF $\alpha$ -induced lipolysis was in part mediated by phosphorylation of ERK1/2. Rosi suppressed TNF $\alpha$ -induced ERK phosphorylation, thereby inhibiting TNF $\alpha$ -induced lipolysis. MEK inhibitor U0126 inhibited TNF $\alpha$ -induced ERK phosphorylation, and reduced TNF $\alpha$ -induced lipolysis to the same level at which Rosi-mediated suppression, implying that suppression of TNF $\alpha$ -induced ERK phosphorylation may be one of the mechanisms by which Rosi suppresses TNF $\alpha$ -induced lipolysis. TSA, through down-regulation of PPAR $\gamma$ , may attenuate the Rosi-mediated suppression of TNF $\alpha$ -induced ERK phosphorylation and lipolysis. U0126 did not completely abolish TNF $\alpha$ -induced lipolysis (Fig. 8), suggesting that signaling pathways other than ERK1/2 may be involved. Moreover, a PPAR $\gamma$ -independent modulation of ERK phosphorylation and lipolysis by TSA can not be ruled out, which requires further experiments to clarify.

PPAR $\gamma$  isoforms ( $\gamma$ 1 and  $\gamma$ 2) are generated by alternative splicing, with PPAR $\gamma$ 2 having an additional 30 amino acids in its N terminus. Treatment with broad-spectrum HDACi TSA or SAHA, which inhibits both class I and class II HDACs, down-regulated PPAR $\gamma$ 1 and  $\gamma$ 2 expression in differentiated adipocytes. The class II HDACi (MC1568) did not affect PPAR $\gamma$  levels, whereas the class I HDACi (MS275) down-regulated PPAR $\gamma$ 2 expression to the same level that TSA and SAHA treatment did without affecting PPAR $\gamma$ 1 expression (Fig. 5). Previous reports have suggested that PPAR $\gamma$ 2 is the more adipogenic PPAR $\gamma$  isoform [39,40,41,42]. However, it is not known whether PPAR $\gamma$  isoforms differ in their anti-inflammatory actions. We found that TSA and MS275 treatment equally down-regulated several known PPAR $\gamma$  target genes such as ATGL, perilipin, G0S2, PDE3B that are involved in adipocyte lipolysis (Fig. S5 and data not shown), consistent with the adipogenic role of PPAR $\gamma$ 2 in adipocytes. However, it remains to be elucidated why the sensitivity of PPAR $\gamma$  isoforms to HDACi is different. Because TSA, but not MS275, attenuated the Rosi-mediated suppression of TNF $\alpha$ -induced ERK phosphorylation and lipolysis, down-regulation of PPAR $\gamma$ 2 and these lipolysis-associated PPAR $\gamma$  target genes may not account for the TSA attenuation of the anti-TNF $\alpha$  effects of Rosi. It remains to be determined whether the decrease in total PPAR $\gamma$  levels, the loss of both PPAR $\gamma$ 1 and PPAR $\gamma$ 2, or other hydroxamate-related but HDACi-independent functions of TSA, may account for the TSA attenuation of TZD-mediated suppression.

Previous reports have shown that during adipocyte differentiation, treatment with 1 mM VPA or 3 nM TSA reduced PPAR $\gamma$  expression, thereby blocking adipogenesis [24]. However in mature adipocytes, treatment with the same dosage of VPA (1 mM) did not affect PPAR $\gamma$  protein levels, and TSA was not included in these studies [37,38]. In preadipocytes, the TSA concentration that was required for PPAR $\gamma$  down-regulation is much lower (3-10 nM) [24], compared to 660 nM and higher concentrations required for PPAR $\gamma$  down-regulation in differentiated adipocytes (Fig. 6AB), suggesting that preadipocytes are more sensitive to HDACi than differentiated adipocytes. We also observed that even at 2 mM concentration, VPA treatment did not affect Rosi-mediated suppression of TNF $\alpha$ -induced lipolysis or increased basal lipolysis, although it increased hyperacetylation of histone H3 in adipocytes (Fig. S6). It is possible that the VPA concentration required for down-regulation of PPAR $\gamma$ 2 in adipocytes may be higher. Alternatively, structurally different HDACi may have different effects on PPAR $\gamma$  expression levels in adipocytes.

Phosphorylation of ERK1/2 has been shown to mediate lipolysis induced by many chronic stimuli, such as ER stress



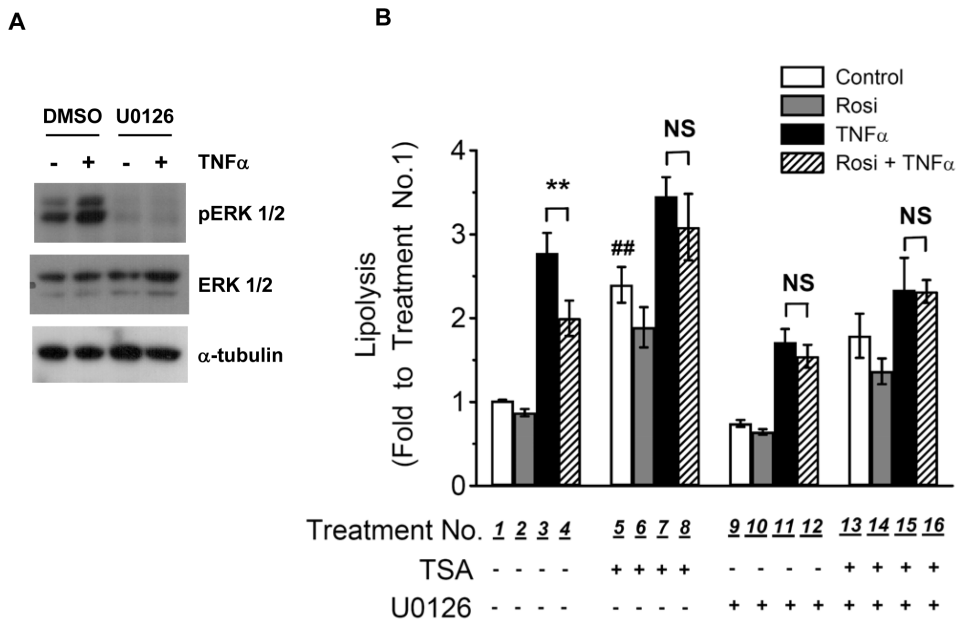

**Figure 8. TSA treatment modulates Rosi-mediated suppression of TNF $\alpha$ -induced lipolysis through ERK1/2.** (A) 3T3-L1 adipocytes were pretreated with vehicle (DMSO) or 25  $\mu$ M U0126 for 1 h, followed by treatment with or without 10 ng/ml TNF $\alpha$  for 30 min. Cellular proteins were solubilized and subjected to SDS-PAGE and Western blot analysis with the indicated antibodies. (B) 3T3-L1 adipocytes were treated with vehicle (Control), 1  $\mu$ M Rosi (Rosi), 10 ng/ml TNF $\alpha$  (TNF $\alpha$ ), or both (Rosi+TNF $\alpha$ ), together with DMSO (bars 1-4), 660 nM TSA (bars 5-8), 25  $\mu$ M U0126 (bars 9-12), or both (bars 13-16) for 24h. Glycerol released into the media and protein concentrations of cell lysate were determined as described in *Materials and Methods*. Each point represents the mean  $\pm$  S.E. of four independent experiments. Asterisks denote significant differences (\*\*:  $p < 0.01$ ). NS, not significant. ##  $p < 0.01$  vs Treatment No.1. doi:10.1371/journal.pone.0071517.g008

[43], Fas ligand [44], interleukin-6 [45], lipopolysaccharide [46], and TNF $\alpha$  [7,12], as indicated by the fact that MEK inhibitor treatment (U0126 or PD98059) attenuates lipolysis induced by these chronic stimuli. Inhibition of ERK phosphorylation has also been correlated with pharmacological suppression of chronic lipolysis. For example, salicylate [47] and metformin [48] treatment suppress TNF $\alpha$ -induced ERK phosphorylation and lipolysis, whereas Rosi treatment suppresses ERK phosphorylation and lipolysis induced by Fas ligand [44], interleukin-6 [45], and TNF $\alpha$  [8,12]. These results suggest that ERK1/2 is an important regulator of chronically stimulated lipolysis. However, the mechanisms by which different pharmacological inhibitors suppress ERK phosphorylation remains to be elucidated. Our results

also imply that ERK1/2 is a molecular target for Rosi-mediated suppression and TSA-mediated modulation of TNF $\alpha$ -induced lipolysis (Fig. 7 and 8). Many upstream kinases or phosphatases may be potential targets for Rosi or TSA modulation to affect ERK phosphorylation in adipocytes. For example, MAP3K8 (also called Tpl2), an upstream kinase to ERK, is up-regulated in obese adipocytes and mediates TNF $\alpha$ -induced ERK activation and lipolysis [49]. MAP kinase phosphatases 1 and 4 have been reported to play a role in pathogenesis of insulin resistance and adipocyte hypertrophy [50,51]. Protein phosphatases such as PP5, have been reported to modulate PPAR $\gamma$  phosphorylation and function [52]. Further experiments will be required to determine whether these upstream kinases and phosphatases are involved in Rosi-mediated suppression and TSA-mediated modulation of TNF $\alpha$ -induced ERK activation and lipolysis.

Many histone acetylation-independent effects have been reported for HDACs [17]. In glioblastoma and prostate cancer cells, TSA and SAHA but not MS275 targeted HDAC1 and 6, thereby disrupting the HDAC and protein phosphatase 1 complex. The release of the protein phosphatase from the HDACs resulted in decreased phosphorylation of Akt and ERK1/2 [53]. However, we did not observe changes in Akt phosphorylation after TSA treatment (data not shown), thus ruling out that decreased Akt activity mediated increases in lipolysis [54]. Moreover, phosphorylation of ERK1/2 was increased after TSA treatment in our experiments (Fig. 6). These results suggest that other mechanisms may account for the TSA-mediated effects in our system.

HDAC inhibitors have emerged as a potential therapeutic method for a wide range of diseases, including cancer, inflammatory, and cardiovascular diseases [17,55]. Although clinically they are well tolerated in general, they do have side effects, and the

**Table 1. Summary of the effects of HDACI treatment on lipolysis, ERK phosphorylation, and PPAR $\gamma$  levels.**

|                                                                                       | TSA | MS275 | MC1568 |
|---------------------------------------------------------------------------------------|-----|-------|--------|
| Increased basal lipolysis                                                             | +   | +     | -      |
| Attenuation of Rosi-mediated suppression of TNF $\alpha$ -induced lipolysis           | +   | -     | -      |
| Increased ERK phosphorylation                                                         | +   | +     | -      |
| Attenuation of Rosi-mediated suppression of TNF $\alpha$ -induced ERK phosphorylation | +   | -     | -      |
| Down-regulation of PPAR $\gamma$ 1                                                    | +   | -     | -      |
| Down-regulation of PPAR $\gamma$ 2                                                    | +   | +     | -      |

doi:10.1371/journal.pone.0071517.t001

molecular mechanisms underlying these side effects remains elusive. Metabolic effects of HDACI treatment have been reported, such as weight gain and insulin resistance for VPA [21,23]. Moreover, HDACI treatment can also alter cellular metabolism, such as fatty acid oxidation and glucose metabolism [22]. The present studies have shown that hydroxamate-based HDACIs, including TSA and SAHA, may affect adipocyte functions such as lipolysis and modulate the anti-TNF $\alpha$  action of TZDs through PPAR $\gamma$ . In light of the clinical application of SAHA and many other HDACIs, a better understanding of their cellular mechanisms and interactions with other therapeutic drugs may allow the design of more effective strategies in disease treatment.

## Supporting Information

**Figure S1 Depletion of endogenous SMRT, NCoR, or PPAR $\gamma$  in 3T3-L1 adipocytes by RNAi.** 3T3-L1 adipocytes were transfected with non-targeting luciferase siRNA (Luc) or siRNA against SMRT, NCoR, or PPAR $\gamma$ . Cellular proteins were solubilized and subjected to SDS-PAGE and Western blot analysis with the indicated antibodies. (TIF)

**Figure S2 Dose- and time-dependent down-regulation of PPAR $\gamma$ 1 and  $\gamma$ 2 by TSA treatment.** (A, B) 3T3-L1 adipocytes were treated in duplicate with increasing TSA doses (0, 6.6, 66, 660, 6600 nM) for 24 h. Cellular proteins were solubilized and subjected to SDS-PAGE and Western blot analysis. Quantification data for PPAR $\gamma$ 1 and  $\gamma$ 2 from three independent experiments are shown in Fig. S2A and B, respectively. Asterisks denote significant differences compared with 0 nM control (\* $p$ <0.05; \*\*\* $p$ <0.001). (C, D) 3T3-L1 adipocytes were treated with vehicle (DMSO) or 660 nM TSA (TSA) for 0, 1, 2, 6, 12, or 24 h. Cellular proteins were solubilized and subjected to SDS-PAGE and Western blot analysis. Quantification data for PPAR $\gamma$ 1 and  $\gamma$ 2 from four independent experiments are shown in Fig. S2C and D, respectively. Asterisks denote significant differences compared with corresponding DMSO value at the same time point (\* $p$ <0.05; \*\*\* $p$ <0.001). (TIF)

**Figure S3 Treatment of proteasomal inhibitor reverses TSA down-regulation of PPAR $\gamma$ .** (A) 3T3-L1 adipocytes were treated with vehicle (Control), 660 nM TSA, 20  $\mu$ M MG132, or both for 6 hr. Cellular proteins were solubilized and subjected to SDS-PAGE and Western blot analysis with the indicated antibodies. Representative immunoblots from four independent experiments were shown in Fig. S3A. (B-D) Quantification data

## References

- Olefsky JM, Glass CK (2010) Macrophages, inflammation, and insulin resistance. *Annu Rev Physiol* 72: 219–246.
- Glass CK, Olefsky JM (2012) Inflammation and lipid signaling in the etiology of insulin resistance. *Cell Metab* 15: 635–645.
- Ryden M, Arner P (2007) Tumour necrosis factor- $\alpha$  in human adipose tissue – from signalling mechanisms to clinical implications. *J Intern Med* 262: 431–438.
- Ruan H, Lodish HF (2003) Insulin resistance in adipose tissue: direct and indirect effects of tumor necrosis factor- $\alpha$ . *Cytokine Growth Factor Rev* 14: 447–455.
- Chen X, Xun K, Chen L, Wang Y (2009) TNF- $\alpha$ , a potent lipid metabolism regulator. *Cell Biochem Funct* 27: 407–416.
- Green A, Rumberger JM, Stuart CA, Ruhoff MS (2004) Stimulation of lipolysis by tumor necrosis factor- $\alpha$  in 3T3-L1 adipocytes is glucose dependent: implications for long-term regulation of lipolysis. *Diabetes* 53: 74–81.
- Zhang HH, Halleib M, Ahmad F, Manganiello VC, Greenberg AS (2002) Tumor necrosis factor- $\alpha$  stimulates lipolysis in differentiated human

adipocytes through activation of extracellular signal-related kinase and elevation of intracellular cAMP. *Diabetes* 51: 2929–2935.

for total PPAR $\gamma$  (B), PPAR $\gamma$ 1 (C), and PPAR $\gamma$ 2 (D) are shown. Asterisks denote significant differences ( $p$ <0.05). (TIF)

**Figure S4 MS275 or MC1568 treatment does not affect Rosi-mediated suppression of TNF $\alpha$ -induced ERK phosphorylation.** 3T3-L1 adipocytes were pretreated with vehicle (DMSO), 5  $\mu$ M MC1568, or 10  $\mu$ M MS275, together with or without 1  $\mu$ M Rosi (Rosi) for 24h. Cells were then treated with or without 10 ng/ml TNF $\alpha$  for 30 min. Cellular proteins were solubilized and subjected to SDS-PAGE and Western blot analysis with the indicated antibodies. Representative immunoblots are shown. (TIF)

**Figure S5 Gene expression levels after TSA treatment.** 3T3-L1 adipocytes were treated with vehicle (Control), 1  $\mu$ M Rosi (Rosi), 10 ng/ml TNF $\alpha$  (TNF $\alpha$ ), or both (Rosi+TNF $\alpha$ ), together with vehicle (DMSO) or 660 nM TSA (TSA) for 24 h. The levels of mRNA were determined by qPCR. Each point represents the mean  $\pm$  S.E. of at least three independent experiments. Asterisks denote significant differences (\* $p$ <0.05; \*\*\* $p$ <0.001). # $p$ <0.05; ## $p$ <0.01; ### $p$ <0.001 compared with corresponding DMSO control. (TIF)

**Figure S6 VPA does not affect the Rosi-mediated suppression of TNF $\alpha$ -induced lipolysis.** (A) 3T3-L1 adipocytes were treated in duplicate with vehicle (H<sub>2</sub>O) or 2 mM VPA for 24 h. Cellular proteins were solubilized and subjected to SDS-PAGE and Western blot analysis with the indicated antibodies. Representative immunoblots are shown. (B) 3T3-L1 adipocytes were treated with vehicle (Control), 1  $\mu$ M Rosi (Rosi), 10 ng/ml TNF $\alpha$  (TNF $\alpha$ ), or both (Rosi+TNF $\alpha$ ), together with vehicle or 2 mM VPA for 24 h. Glycerol released into the media and protein concentrations of cell lysate were determined as described in *Materials and Methods*. Each point represents the mean  $\pm$  S.E. of three independent experiments. Asterisks denote significant differences (\*\*\* $p$ <0.001). (TIF)

## Acknowledgments

The authors thank Drs. Li-Chung Hsu and Paul Wu for critically reading the manuscript, and Miss Hui-Ping Chu for technical assistance.

## Author Contributions

Conceived and designed the experiments: JCL. Performed the experiments: YTC YCL CKL ZSW JCL. Analyzed the data: JCL CTW. Wrote the paper: JCL CTW.

- adipocytes through activation of extracellular signal-related kinase and elevation of intracellular cAMP. *Diabetes* 51: 2929–2935.
- Souza SC, Yamamoto MT, Franciosa MD, Lien P, Greenberg AS (1998) BRL 49653 blocks the lipolytic actions of tumor necrosis factor- $\alpha$ : a potential new insulin-sensitizing mechanism for thiazolidinediones. *Diabetes* 47: 691–695.
- Yang X, Zhang X, Heckmann BL, Lu X, Liu J (2011) Relative contribution of adipose triglyceride lipase and hormone-sensitive lipase to TNF- $\alpha$ -induced lipolysis in adipocytes. *J Biol Chem* 286: 40477–40485.
- Ryden M, Dicker A, van Harmelen V, Hauner H, Brunnberg M, et al. (2002) Mapping of early signaling events in tumor necrosis factor- $\alpha$ -mediated lipolysis in human fat cells. *J Biol Chem* 277: 1085–1091.
- Ryden M, Arvidsson E, Blomqvist L, Perbeck L, Dicker A, et al. (2004) Targets for TNF- $\alpha$ -induced lipolysis in human adipocytes. *Biochem Biophys Res Commun* 318: 168–175.
- Souza SC, Palmer HJ, Kang YH, Yamamoto MT, Muliro KV, et al. (2003) TNF- $\alpha$  induction of lipolysis is mediated through activation of the extracellular signal related kinase pathway in 3T3-L1 adipocytes. *J Cell Biochem* 89: 1077–1086.

13. Lee MJ, Fried SK (2012) Glucocorticoids antagonize tumor necrosis factor- $\alpha$ -stimulated lipolysis and resistance to the antilipolytic effect of insulin in human adipocytes. *Am J Physiol Endocrinol Metab* 303: E1126–1133.
14. Rahn Landstrom T, Mei J, Karlsson M, Manganiello V, Degerman E (2000) Down-regulation of cyclic-nucleotide phosphodiesterase 3B in 3T3-L1 adipocytes induced by tumour necrosis factor  $\alpha$  and cAMP. *Biochem J* 346 Pt 2: 337–343.
15. Rosenbaum SE, Greenberg AS (1998) The short- and long-term effects of tumor necrosis factor- $\alpha$  and BRL 49653 on peroxisome proliferator-activated receptor (PPAR) $\gamma$ 2 gene expression and other adipocyte genes. *Mol Endocrinol* 12: 1150–1160.
16. Ricote M, Glass CK (2007) PPARs and molecular mechanisms of transrepression. *Biochim Biophys Acta* 1771: 926–935.
17. Xu WS, Parmigiani RB, Marks PA (2007) Histone deacetylase inhibitors: molecular mechanisms of action. *Oncogene* 26: 5541–5552.
18. Reichert N, Choukralah MA, Matthias P (2012) Multiple roles of class I HDACs in proliferation, differentiation, and development. *Cell Mol Life Sci* 69: 2173–2187.
19. Marks PA, Breslow R (2007) Dimethyl sulfoxide to vorinostat: development of this histone deacetylase inhibitor as an anticancer drug. *Nat Biotechnol* 25: 84–90.
20. Blaheta RA, Cinatl J, Jr. (2002) Anti-tumor mechanisms of valproate: a novel role for an old drug. *Med Res Rev* 22: 492–511.
21. Hamed S (2007) Leptin and insulin homeostasis in epilepsy: relation to weight adverse conditions. *Epilepsy Res* 75: 1–9.
22. Wardell SE, Ilkayeva OR, Wieman HL, Frigo DE, Rathmell JC, et al. (2009) Glucose metabolism as a target of histone deacetylase inhibitors. *Mol Endocrinol* 23: 388–401.
23. Jallon P, Picard F (2001) Bodyweight gain and anticonvulsants: a comparative review. *Drug Saf* 24: 969–978.
24. Lagace DC, Nachtigal MW (2004) Inhibition of histone deacetylase activity by valproic acid blocks adipogenesis. *J Biol Chem* 279: 18851–18860.
25. Kim SN, Choi HY, Kim YK (2009) Regulation of adipocyte differentiation by histone deacetylase inhibitors. *Arch Pharm Res* 32: 535–541.
26. Catalioto RM, Maggi CA, Giuliani S (2009) Chemically distinct HDAC inhibitors prevent adipose conversion of subcutaneous human white preadipocytes at an early stage of the differentiation program. *Exp Cell Res* 315: 3267–3280.
27. Fajas L, Egler V, Reiter R, Hansen J, Kristiansen K, et al. (2002) The retinoblastoma-histone deacetylase 3 complex inhibits PPAR $\gamma$  and adipocyte differentiation. *Dev Cell* 3: 903–910.
28. Wiper-Bergeron N, Salem HA, Tomlinson JJ, Wu D, Hache RJ (2007) Glucocorticoid-stimulated preadipocyte differentiation is mediated through acetylation of C/EBP $\beta$  by GCN5. *Proc Natl Acad Sci U S A* 104: 2703–2708.
29. Huang J, Imamura T, Babendure JL, Lu JC, Olefsky JM (2005) Disruption of microtubules ablates the specificity of insulin signaling to GLUT4 translocation in 3T3-L1 adipocytes. *J Biol Chem* 280: 42300–42306.
30. Kershaw EE, Schupp M, Guan HP, Gardner NP, Lazar MA, et al. (2007) PPAR $\gamma$  regulates adipose triglyceride lipase in adipocytes in vitro and in vivo. *Am J Physiol Endocrinol Metab* 293: E1736–1745.
31. Liao W, Nguyen MT, Yoshizaki T, Favellyukis S, Patsouris D, et al. (2007) Suppression of PPAR $\gamma$  Attenuates Insulin-Stimulated Glucose Uptake by Affecting Both GLUT1 and GLUT4 in 3T3-L1 Adipocytes. *Am J Physiol Endocrinol Metab* 293: E219–227.
32. Picard F, Kurtev M, Chung N, Topark-Ngarm A, Senawong T, et al. (2004) Sirt1 promotes fat mobilization in white adipocytes by repressing PPAR- $\gamma$ . *Nature* 429: 771–776.
33. Guan HP, Ishizuka T, Chui PC, Lehrke M, Lazar MA (2005) Corepressors selectively control the transcriptional activity of PPAR $\gamma$  in adipocytes. *Genes Dev* 19: 453–461.
34. Lu JC, Piazza TM, Schuler LA (2005) Proteasomes mediate prolactin-induced receptor down-regulation and fragment generation in breast cancer cells. *J Biol Chem* 280: 33909–33916.
35. Pascual G, Fong AL, Ogawa S, Gamliel A, Li AC, et al. (2005) A SUMOylation-dependent pathway mediates transrepression of inflammatory response genes by PPAR- $\gamma$ . *Nature* 437: 759–763.
36. Ghisletti S, Huang W, Ogawa S, Pascual G, Lin ME, et al. (2007) Parallel SUMOylation-dependent pathways mediate gene- and signal-specific transrepression by LXRs and PPAR $\gamma$ . *Mol Cell* 25: 57–70.
37. Qiao L, Schaack J, Shao J (2006) Suppression of adiponectin gene expression by histone deacetylase inhibitor valproic acid. *Endocrinology* 147: 865–874.
38. Lagace DC, McLeod RS, Nachtigal MW (2004) Valproic acid inhibits leptin secretion and reduces leptin messenger ribonucleic acid levels in adipocytes. *Endocrinology* 145: 5493–5503.
39. Medina-Gomez G, Gray SL, Yetukuri L, Shimomura K, Virtue S, et al. (2007) PPAR  $\gamma$  2 prevents lipotoxicity by controlling adipose tissue expandability and peripheral lipid metabolism. *PLoS Genet* 3: e64.
40. Werman A, Hollenberg A, Solanes G, Bjorbaek C, Vidal-Puig AJ, et al. (1997) Ligand-independent activation domain in the N terminus of peroxisome proliferator-activated receptor  $\gamma$  (PPAR $\gamma$ ). Differential activity of PPAR $\gamma$ 1 and -2 isoforms and influence of insulin. *J Biol Chem* 272: 20230–20235.
41. Vidal-Puig A, Jimenez-Linan M, Lowell BB, Hamann A, Hu E, et al. (1996) Regulation of PPAR  $\gamma$  gene expression by nutrition and obesity in rodents. *J Clin Invest* 97: 2553–2561.
42. Ren D, Collingwood TN, Rebar EJ, Wolffe AP, Camp HS (2002) PPAR $\gamma$  knockdown by engineered transcription factors: exogenous PPAR $\gamma$ 2 but not PPAR $\gamma$ 1 reactivates adipogenesis. *Genes Dev* 16: 27–32.
43. Deng J, Liu S, Zou L, Xu C, Bin G, et al. (2012) Lipolysis response to endoplasmic reticulum stress in adipose cells. *J Biol Chem* 287: 6240–6249.
44. Rapold RA, Wuest S, Knoepfel A, Schoenle EJ, Konrad D (2013) Fas activates lipolysis in a Ca<sup>2+</sup>-CaMKII-dependent manner in 3T3-L1 adipocytes. *J Lipid Res* 54: 63–70.
45. Yang Y, Yang G (2010) Rosiglitazone regulates IL-6-stimulated lipolysis in porcine adipocytes. *Biochem Cell Biol* 88: 853–860.
46. Zu L, He J, Jiang H, Xu C, Pu S, et al. (2009) Bacterial endotoxin stimulates adipose lipolysis via toll-like receptor 4 and extracellular signal-regulated kinase pathway. *J Biol Chem* 284: 5915–5926.
47. Zu L, Jiang H, He J, Xu C, Pu S, et al. (2008) Salicylate blocks lipolytic actions of tumor necrosis factor- $\alpha$  in primary rat adipocytes. *Mol Pharmacol* 73: 215–223.
48. Ren T, He J, Jiang H, Zu L, Pu S, et al. (2006) Metformin reduces lipolysis in primary rat adipocytes stimulated by tumor necrosis factor- $\alpha$  or isoproterenol. *J Mol Endocrinol* 37: 175–183.
49. Jager J, Gremeaux T, Gonzalez T, Bonnafous S, Debard C, et al. (2010) Tpl2 kinase is upregulated in adipose tissue in obesity and may mediate interleukin-1 $\beta$  and tumor necrosis factor- $\alpha$  effects on extracellular signal-regulated kinase activation and lipolysis. *Diabetes* 59: 61–70.
50. Bazuine M, Carlotti F, Tafrechi RS, Hoeben RC, Maassen JA (2004) Mitogen-activated protein kinase (MAPK) phosphatase-1 and -4 attenuate p38 MAPK during dexamethasone-induced insulin resistance in 3T3-L1 adipocytes. *Mol Endocrinol* 18: 1697–1707.
51. Ito A, Suganami T, Miyamoto Y, Yoshimasa Y, Takeya M, et al. (2007) Role of MAPK phosphatase-1 in the induction of monocyte chemoattractant protein-1 during the course of adipocyte hypertrophy. *J Biol Chem* 282: 25445–25452.
52. Hinds TD, Jr., Stechschulte LA, Cash HA, Whisler D, Banerjee A, et al. (2011) Protein phosphatase 5 mediates lipid metabolism through reciprocal control of glucocorticoid receptor and peroxisome proliferator-activated receptor- $\gamma$  (PPAR $\gamma$ ). *J Biol Chem* 286: 42911–42922.
53. Chen CS, Weng SC, Tseng PH, Lin HP, Chen CS (2005) Histone acetylation-independent effect of histone deacetylase inhibitors on Akt through the reshuffling of protein phosphatase 1 complexes. *J Biol Chem* 280: 38879–38887.
54. Kitamura T, Kitamura Y, Kuroda S, Hino Y, Ando M, et al. (1999) Insulin-induced phosphorylation and activation of cyclic nucleotide phosphodiesterase 3B by the serine-threonine kinase Akt. *Mol Cell Biol* 19: 6286–6296.
55. Khan O, La Thangue NB (2012) HDAC inhibitors in cancer biology: emerging mechanisms and clinical applications. *Immunol Cell Biol* 90: 85–94.
